# Supplementary material
Source: PubMed Central journal article supplement (PMC3269307)
Supplement: NIHMS330087-supplement-1_si_001.pdf [file NIHMS330087-supplement-1_si_001.pdf]

**Table S1. Catalytic properties (at 25 °C, pH 7.5) of MMP-12 variants with mild substitutions and activities nearly intact.**

| <i>MMP-12 variant</i> <sup>a</sup> | <i>Location of mutation</i> | <i>General</i>              |                             | <i>fEln-100</i> |                           |
|------------------------------------|-----------------------------|-----------------------------|-----------------------------|-----------------|---------------------------|
|                                    |                             | <i>Substrate FS-6</i>       |                             |                 |                           |
|                                    |                             | $k_{cat}/K_m, M^{-1}s^{-1}$ | $k_{cat}/K_m, M^{-1}s^{-1}$ | $K_m, \mu M$    | $k_{cat}, 10^{-2} s^{-1}$ |
| <b>MMP-12</b>                      | -                           | 133,800 ± 6000              | 10,690 ± 430                | 1.06 ± 0.04     | 1.06 ± 0.04               |
| <b>Y132S</b>                       | hA                          | 158,900 ± 4800              | 9710 ± 390                  | 0.86 ± 0.04     | 0.83 ± 0.03               |
| <b>S142E</b>                       | hA                          | 144,600 ± 4300              | 9130 ± 370                  | 1.15 ± 0.04     | 1.05 ± 0.04               |
| <b>V144A</b>                       | hA                          | 141,700 ± 4300              | 9030 ± 360                  | 1.18 ± 0.05     | 1.07 ± 0.04               |
| <b>K148T</b>                       | sII                         | 146,700 ± 4400              | 10,200 ± 410                | 1.06 ± 0.04     | 1.08 ± 0.04               |
| <b>N153Y</b>                       | II-III loop                 | 132,600 ± 4000              | 10,850 ± 430                | 1.04 ± 0.04     | 1.13 ± 0.05               |
| <b>V162S</b>                       | sIII                        | 157,800 ± 4700              | 10,380 ± 420                | 1.29 ± 0.04     | 1.34 ± 0.05               |
| <b>A164V</b>                       | sIII                        | 148,800 ± 4500              | 10,410 ± 420                | 1.10 ± 0.04     | 1.15 ± 0.05               |
| <b>G166R</b>                       | sIII                        | 140,100 ± 4200              | 9830 ± 390                  | 0.97 ± 0.04     | 0.95 ± 0.04               |
| <b>D200E</b>                       | V-B loop                    | 144,800 ± 4300              | 9470 ± 380                  | 0.88 ± 0.03     | 0.84 ± 0.03               |
| <b>S207V</b>                       | V-B loop                    | 143,300 ± 4300              | 9440 ± 380                  | 0.97 ± 0.04     | 0.92 ± 0.04               |
| <b>I255R</b>                       | hC                          | 136,000 ± 4100              | 9770 ± 390                  | 0.99 ± 0.04     | 0.97 ± 0.04               |
| <b>I255V</b>                       | hC                          | 138,400 ± 4200              | 9980 ± 400                  | 1.08 ± 0.04     | 1.08 ± 0.04               |

<sup>a</sup> Each mutation is found at the equivalent position in a less elastolytic homologue such as MMP-3, 8, 10, 11, 26, 27, or MT-MMP.

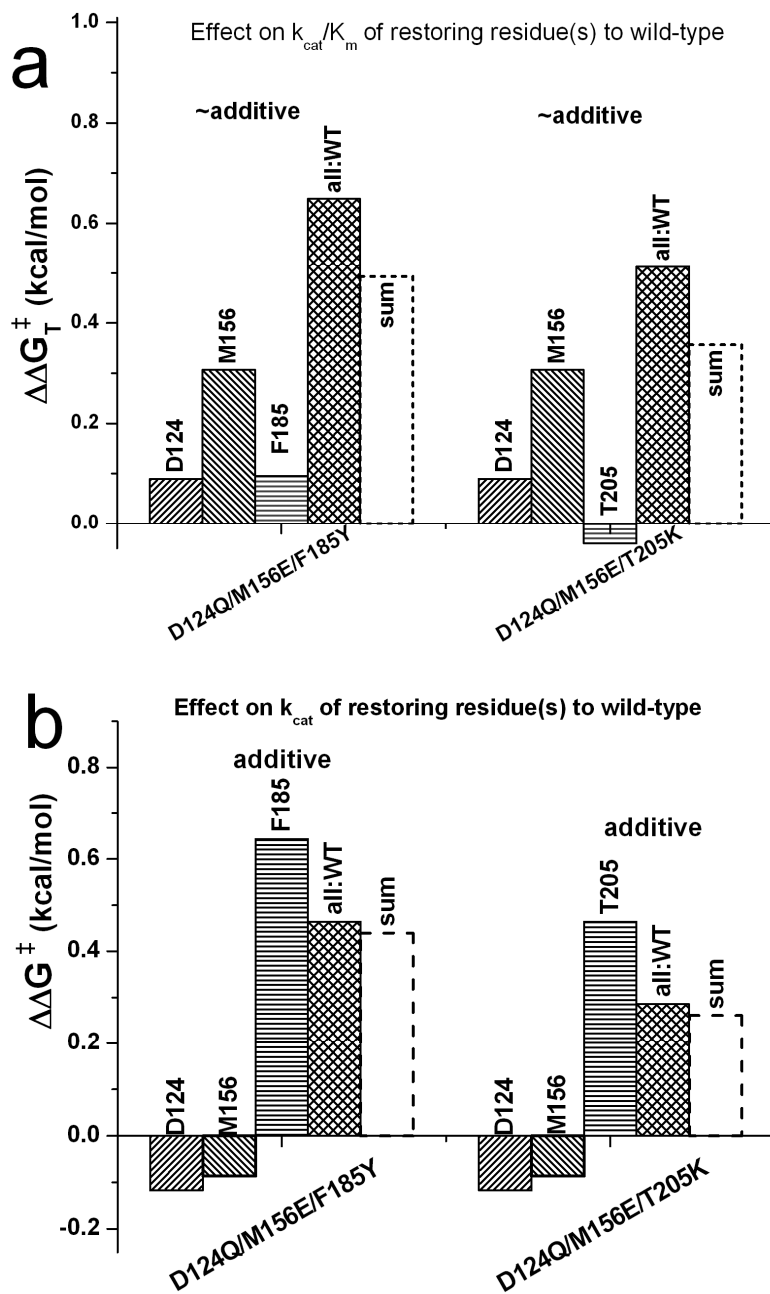

**Fig. S1.** “Double” mutant cycle analysis of effects on (a)  $k_{cat}/K_m$  and (b)  $k_{cat}$  for triple mutations that include a point mutation on either extreme of the active site cleft: F185Y on the unprimed side or T205K on the primed side. The data are plotted as described in the legend of Fig. 4.  $\Delta\Delta G^\ddagger_T$  is calculated using eq. 1 and  $\Delta\Delta G^\ddagger$  using eq. 3.

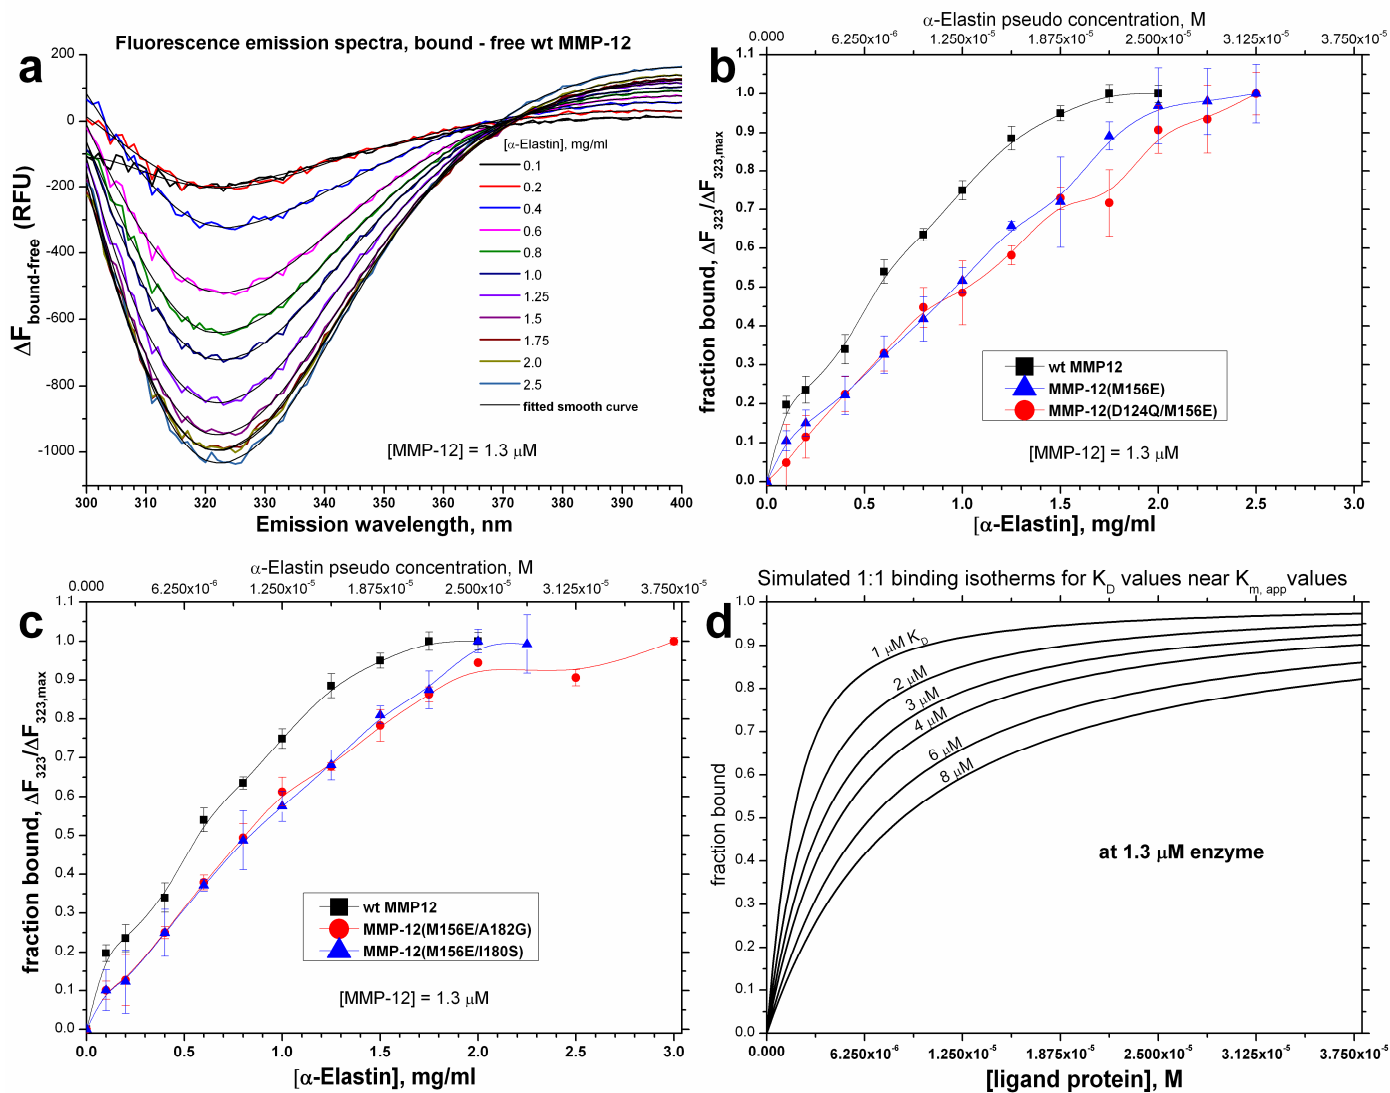

**Fig. S2. Comparison of affinity for  $\alpha$ -elasin of MMP-12 variants that have apparent  $K_m$  increased by more than two-fold.** (a) Intrinsic tryptophan fluorescence changes of  $1.3 \mu\text{M}$  MMP-12 variants were monitored as a function of increasing  $\alpha$ -elasin concentration which quenched the fluorescence emission of the MMP, which is maximal at  $323 \pm 1$  nm. Elastin lacks any tryptophan. (b,c) The titrations with  $\alpha$ -elasin were conducted in triplicate for wt MMP-12 and the four mutants having  $K_m$  increased  $>$  two-fold, each of which contain the M156E lesion. The fluorescence emission changes were normalized to a scale of 0 to 1 using the maximum fluorescence change at the plateau reached from 2 to 3 mg/ml.  $\alpha$ -elasin ( $I$ ) is a continuum of species migrating with apparent mobility on SDS-PAGE ranging from  $\sim 10$  kDa to  $> 150$  kDa. By oversimplifying this heterogeneity to an average MW of  $\sim 80$  kDa, the  $\alpha$ -elasin concentration was converted to the pseudo, apparent molar concentration labeled atop (b, c) for comparison with (d). (d) For comparison, simulated binding isotherms for simple single-site binding are plotted for  $K_D$  values approximately spanning the range of fitted  $K_m$  values.

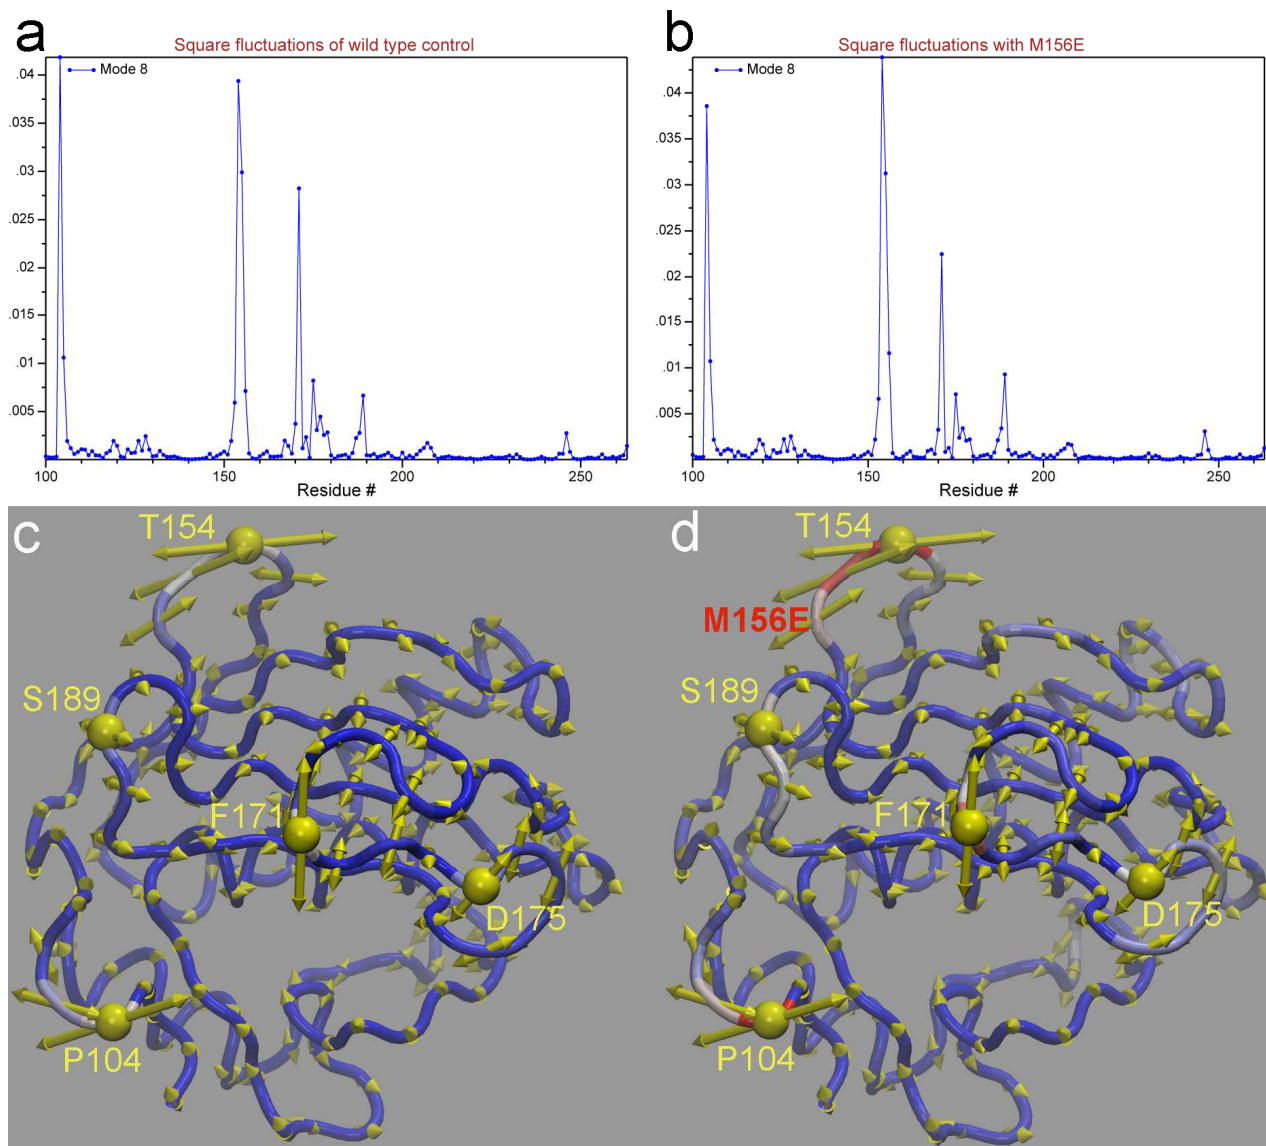

**Fig. S3. Amplitude of motions differed detectably in the 8<sup>th</sup> lowest normal mode, as a result of the M156E mutation of MMP-12.** The amplitude of fluctuations is represented on an arbitrary scale both by the vertical axes of panels *a* and *b* and the length of arrows in panels *c* and *d*. Results are shown for the unmodified, lowest energy NMR structure at left and carrying the M156E substitution at right. Labels in *c* and *d* mark residues with locally high fluctuations that were changed by M156E. In *c* and *d*, red backbone coloration indicates relatively larger fluctuations and white medium-sized fluctuations. The simulations used the anisotropic network model available at an online server (2).

**Movie S1. Fluctuations of normal mode 8 with M156E.** The simulation in the accompanying .mpg file is that of Fig. S3b,d and was generated using the Normal Mode Wizard and Movie Maker plugin of VMD (3).

#### REFERENCES

1. Partridge, S. M., Davis, H. F., and Adair, G. S. (1955) The chemistry of connective tissues. 2. Soluble proteins derived from partial hydrolysis of elastin, *Biochem J* 61, 11-21.
2. Eyal, E., Yang, L.-W., and Bahar, I. (2006) Anisotropic network model: systematic evaluation and a new web interface, *Bioinformatics* 22, 2619-2627.
3. Humphrey, W., Dalke, A., and Schulten, K. (1996) VMD: visual molecular dynamics, *J Mol Graph* 14, 33-38, 27-38.
